# Supplementary material
Source: PubMed Central journal article supplement (PMC6203753)
Supplement: 41423_2018_94_MOESM1_ESM.pdf [file 41423_2018_94_MOESM1_ESM.pdf]

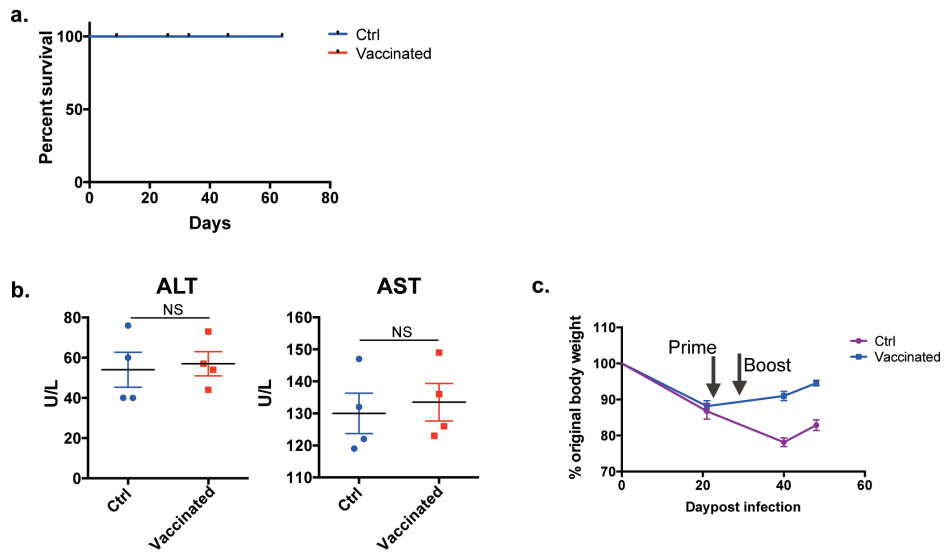

**Supplementary Figure 1. The survival and immunopathology of control and vaccinated mice. (a)** The survival present of control and vaccinated mice. **(b)** The sera levels of ALT and AST in control and vaccinated mice. **(c)** The bodyweight reduction of control and vaccinated mice. These data are representative of three independent experiments (n=4) and were analyzed by two-tailed unpaired *t*-tests **(a-b)**. Error bars denote s.e.m. NS, not significant.

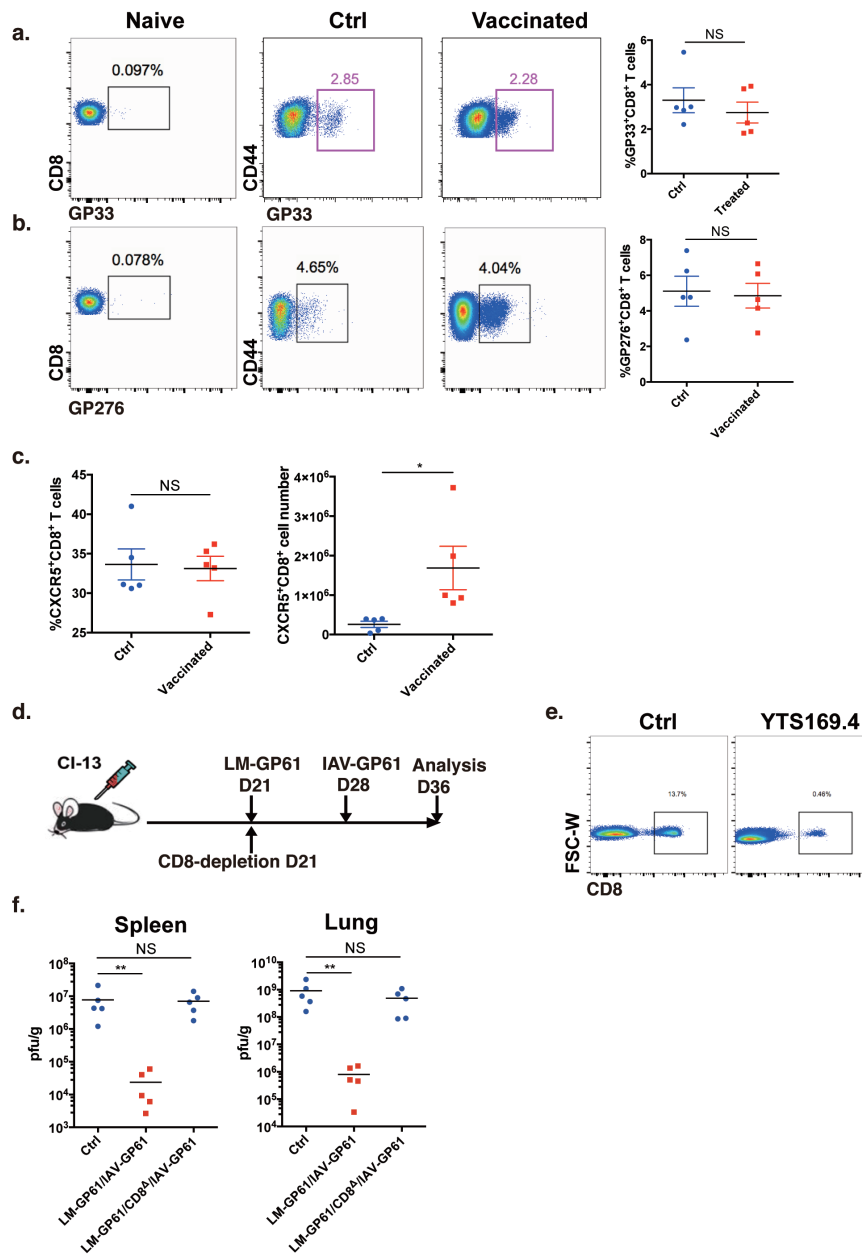

**Supplementary Figure 2. Virus-specific CD8<sup>+</sup> T cells are essential for the control of viral replication in the heterologous prime-boost vaccination.** (a-b) Tetramer staining and frequency of GP33 and GP276-specific CD8<sup>+</sup> T cells (n=5). (c) The frequency and number of CXCR5<sup>+</sup>CD8<sup>+</sup> T cells in the spleens of control and vaccinated mice (n=5). (d) CD8<sup>+</sup> T cell were depleted in the vaccinated mice at the time of priming. (e) Depletion efficiency of CD8<sup>+</sup> T cell. (f) Viral titers in the indicated tissues (n=5). The data are representative of three independent experiments and were analyzed by two-tailed unpaired *t*-tests (a-c) and Mann-Whitney tests (e). Error bars denote s.e.m. \**P*<0.05. NS, not significant.

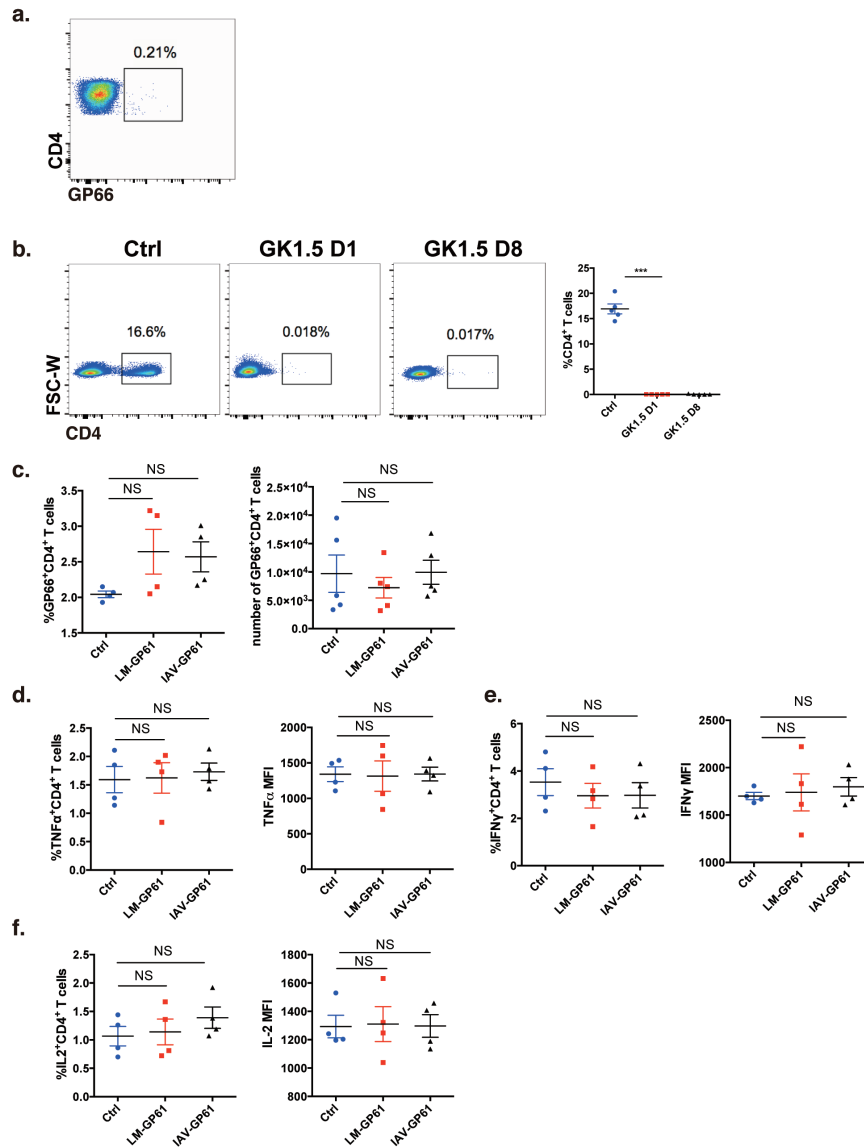

**Supplementary Figure 3. Single immunization with either LM-GP61 or IAV-GP61 could not significantly enhance CD4<sup>+</sup> T cell response in chronic viral infection. (a)** Tetramer staining of LCMV-GP66 on naïve CD4<sup>+</sup> T cells. **(b)** The depletion efficiency of CD4<sup>+</sup> T cell (n=5). **(c)** The frequency and number of LCMV specific GP66<sup>+</sup>CD4<sup>+</sup> T cells in the spleens of control and vaccinated mice (n=5). **(d-f)** The cytokine production of LCMV-specific CD4<sup>+</sup> T cells in the spleens of control and immunized mice (n=5) upon stimulation with an LCMV-specific peptide (GP61-77). MFI, mean fluorescence intensity. The data are representative of three independent experiments and were analyzed by two-tailed unpaired *t*-tests **(b-f)**. Error bars denote s.e.m. \*\*\**P*<0.001. NS, not significant.

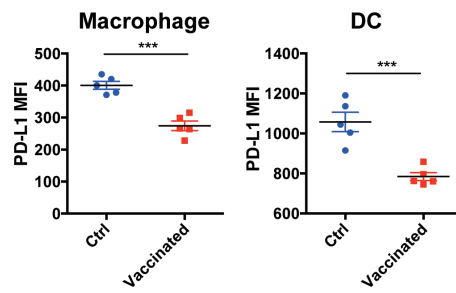

**Supplementary Figure 4. The expression levels of PD-L1 in macrophages and dendritic cells (DCs) from the spleens of control and vaccinated mice.** The data are representative of three independent experiments (n=5) and were analyzed by two-tailed unpaired *t*-tests. Error bars denote s.e.m. \*\*\* $P < 0.001$ .

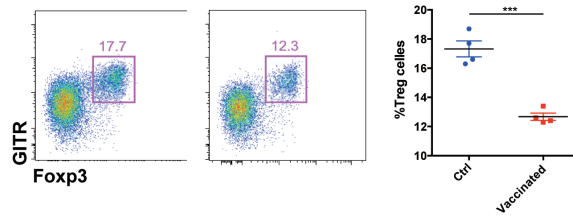

**Supplementary Figure 5. The frequency of regulatory T cells (Treg cells) in the spleens of control and vaccinated mice.** The data are representative of three independent experiments (n=4) and were analyzed by two-tailed unpaired *t*-tests. Error bars denote s.e.m. \*\*\* $P < 0.001$ .
