# Supplementary material
Source: PubMed Central journal article supplement (PMC6203753)
Supplement: 41423_2018_94_MOESM2_ESM.pdf [file 41423_2018_94_MOESM2_ESM.pdf]

**Supplementary Table 1. Antibodies used in flow cytometry.**

| <b>Antibody target/Reagent</b> | <b>Clone</b> | <b>Provider</b>        |
|--------------------------------|--------------|------------------------|
| CD107a                         | 1D4B         | BD Biosciences         |
| CD107b                         | ABL-93       | BD Biosciences         |
| CD11b                          | M1/70        | BD Biosciences         |
| CD11c                          | N418         | Biolegend              |
| CD19                           | 6D5          | Biolegend              |
| CD4                            | GK1.5        | Biolegend              |
| CD44                           | IM7          | Biolegend              |
| CD45R                          | RA3-6B2      | Biolegend              |
| CD68                           | FA-11        | Biolegend              |
| CD8                            | 53-6.7       | Biolegend              |
| CD95(FAS)                      | 554258       | BD Biosciences         |
| F4/80                          | BM8          | Biolegend              |
| Biotin Goat anti-Rat IgG       | 112-066-003  | Jackson Immunoresearch |
| IFN- $\gamma$                  | XMG1.2       | Biolegend              |
| MHC-II                         | M5/114.15.2  | eBioscience            |
| PD-1                           | RMP1-30      | eBioscience            |
| PD-L1                          | 12-5986-81   | eBioscience            |
| Purified Rat Anti-Mouse CXCR5  | 2G8          | BD Biosciences         |
| streptavidin                   | 25-4317-82   | eBioscience            |
| Tim3                           | A20          | R&D Systems            |
| TNF- $\alpha$                  | MP6-XT22     | BD Biosciences         |
| IL-2                           | JES6-5H4     | Biolegend              |
| PNA                            | FL-1071      | Vector Labs            |
